# Supplementary material for: Dissecting the Genetic Mechanisms of Hemicellulose Content in Rapeseed Stalk
Source: MDPI journal article supplement (doi:10.3390/agronomy12112886), 2022-11-18

## Supplementary Information:

**Supplementary Table S1 Genome-wide association study results of hemicellulose content in different tissues of 139 rapeseed samples in different environments.**

| Tissue site | Correlation interval | Peak SNPs                 | P value  |
|-------------|----------------------|---------------------------|----------|
| Stalk       | qHCs.C05             | Bn-scaff_16045_1-p235411  | 9.86E-05 |
|             | qHCs.C02             | Bn-scaff_22144_1-p207843  | 1.46E-04 |
|             | qHCs.C08             | Bn-scaff_16197_1-p2621761 | 1.89E-04 |
|             | qHCs.C05             | Bn-scaff_16414_1-p1114696 | 2.78E-04 |
|             | qHCs.C02             | Bn-scaff_17831_1-p193351  | 2.86E-04 |
|             | qHCs.C02             | Bn-scaff_17831_1-p205619  | 4.11E-04 |
|             | qHCs.A06             | Bn-A06-p24220121          | 4.41E-04 |
|             | qHCs.C02             | Bn-scaff_17109_4-p159217  | 5.45E-04 |
|             | qHCs.C02             | Bn-scaff_22144_1-p223560  | 6.67E-04 |
|             | qHCs.C02             | Bn-scaff_22144_1-p224402  | 6.67E-04 |
|             | qHCs.A01             | Bn-A01-p25561204          | 6.83E-04 |
|             | qHCs.A05             | Bn-A08-p1404439           | 7.32E-04 |
|             | qHCs.C05             | Bn-scaff_16414_1-p1115223 | 7.46E-04 |
|             | qHCs.C08             | Bn-scaff_16197_1-p2853374 | 8.08E-04 |
|             | qHCs.C08             | Bn-scaff_16197_1-p2852488 | 8.08E-04 |
|             | qHCs.C02             | Bn-scaff_17831_1-p161012  | 8.09E-04 |
|             | qHCs.C02             | Bn-scaff_17831_1-p173520  | 8.09E-04 |
|             | qHCs.C02             | Bn-scaff_17831_1-p215612  | 8.09E-04 |
|             | qHCs.C02             | Bn-scaff_17831_1-p198992  | 8.09E-04 |
|             | qHCs.C05             | Bn-scaff_18181_1-p176182  | 8.87E-04 |
|             | qHCs.C02             | Bn-scaff_17831_1-p211127  | 9.98E-04 |
| Taproot     | qHCt.A09             | Bn-A09-p5255753           | 3.67E-04 |
|             | qHCt.A09             | Bn-A09-p4683160           | 4.29E-04 |
|             | qHCt.A09             | Bn-A09-p4683384           | 4.29E-04 |
|             | qHCt.C05             | Bn-scaff_16414_1-p1114696 | 4.46E-04 |
|             | qHCt.C08             | Bn-scaff_16545_1-p80303   | 8.46E-04 |
|             | qHCt.C05             | Bn-scaff_16414_1-p1115223 | 9.18E-04 |
|             | qHCt.C08             | Bn-scaff_16545_1-p238397  | 9.61E-04 |

**Supplementary Table S2 Significant differentially expressed genes associated with hemicellulose in rapeseed stalk and taproot.**

| Candidate genes         | Physical position            | Homologs in Arabidopsis | Gene annotation                                                          |
|-------------------------|------------------------------|-------------------------|--------------------------------------------------------------------------|
| <i>BnaC09G0154700ZS</i> | chrC09_1212404<br>5-12126631 | <i>AT1G64440</i>        | Involved in growth and cell wall carbohydrate biosynthesis.              |
| <i>BnaA09G0143100ZS</i> | chrA09_7954088<br>-7957666   | <i>AT1G64440</i>        | Involved in growth and cell wall carbohydrate biosynthesis.              |
| <i>BnaA07G0274700ZS</i> | chrA07_2335402<br>9-23358595 | <i>AT1G68560</i>        | Maintain cell wall integrity and regulate seed germination.              |
| <i>BnaC06G0311300ZS</i> | chrC06_3918844<br>5-39192967 | <i>AT1G68560</i>        | Maintain cell wall integrity and regulate seed germination.              |
| <i>BnaA07G0302500ZS</i> | chrA07_2503336<br>7-25037553 | <i>AT1G68560</i>        | Maintain cell wall integrity and regulate seed germination.              |
| <i>BnaA03G0389200ZS</i> | chrA03_2084519<br>1-20849607 | <i>AT2G06850</i>        | endoxyloglucan transferase (EXGT-A1) gene.                               |
| <i>BnaC03G0481900ZS</i> | chrC03_3483819<br>2-34840257 | <i>AT2G06850</i>        | endoxyloglucan transferase (EXGT-A1) gene.                               |
| <i>BnaA07G0164200ZS</i> | chrA07_1681301<br>6-16815286 | <i>AT2G28760</i>        | Encodes a cytosolic isoform of UDP-glucuronic acid.                      |
| <i>BnaA03G0176300ZS</i> | chrA03_9010734<br>-9025747   | <i>AT2G36870</i>        | Encodes a xyloglucan endotransglycosylase/hydrolase.                     |
| <i>BnaC04G0096900ZS</i> | chrC04_8674178-<br>8676284   | <i>AT2G36870</i>        | Encodes a xyloglucan endotransglycosylase/hydrolase.                     |
| <i>BnaA04G0236500ZS</i> | chrA04_1929114<br>2-19293359 | <i>AT2G36870</i>        | Encodes a xyloglucan endotransglycosylase/hydrolase.                     |
| <i>BnaC04G0551800ZS</i> | HiCscfoid2136<br>_2695-4910  | <i>AT2G36870</i>        | Encodes a xyloglucan endotransglycosylase/hydrolase.                     |
| <i>BnaC01G0472900ZS</i> | chrC01_5137137<br>8-51376055 | <i>AT3G10740</i>        | It may be involved in cell wall modification.                            |
| <i>BnaC01G0284100ZS</i> | chrC01_2447897<br>0-24480096 | <i>AT3G48580</i>        | Encodes a cell-wall localized xyloglucan endotransglucosylase/hydrolase. |
| <i>BnaC09G0010900ZS</i> | chrC09_1333387-<br>1335694   | <i>AT4G02500</i>        | Encodes a protein with xylosyltransferase activity.                      |
| <i>BnaC09G0019300ZS</i> | chrC09_1842588-<br>1844340   | <i>AT4G03210</i>        | Encodes a member of xyloglucan endotransglucosylase/hydrolases (XTHs).   |
| <i>BnaC09G0316000ZS</i> | chrC09_3387978<br>8-33883916 | <i>AT4G08160</i>        | Encodes a putative glycosyl hydrolase family 10 protein (xylanase).      |
| <i>BnaA09G0268200ZS</i> | chrA09_2067678<br>1-20702031 | <i>AT4G08160</i>        | Encodes a putative glycosyl hydrolase family 10 protein (xylanase).      |
| <i>BnaA03G0482400ZS</i> | chrA03_2680380               | <i>AT4G24910</i>        | glucuronoxylan 4-O-methyltransferase-like protein (DUF579)               |

|                         |                           |                  |                                                                                                   |
|-------------------------|---------------------------|------------------|---------------------------------------------------------------------------------------------------|
|                         | 1-26807421                |                  |                                                                                                   |
| <i>BnaC02G0002600ZS</i> | chrC02_379722-381857      | <i>AT5G01360</i> | Involved in the synthesis and deposition of secondary wall cellulose.                             |
| <i>BnaC03G0005500ZS</i> | chrC03_270684-276603      | <i>AT5G01360</i> | Involved in the synthesis and deposition of secondary wall cellulose.                             |
| <i>BnaA03G0517200ZS</i> | chrA03_2907845-5-29089840 | <i>AT5G48070</i> | putative xyloglucan endotransglycosylase/hydrolase.                                               |
| <i>BnaC01G0083600ZS</i> | chrC01_4911787-4913194    | <i>AT5G01360</i> | Involved in the synthesis and deposition of secondary wall cellulose.                             |
| <i>BnaC07G0495800ZS</i> | chrC07_5597120-9-55990650 | <i>AT5G01360</i> | Involved in the synthesis and deposition of secondary wall cellulose.                             |
| <i>BnaC02G0539800ZS</i> | chrC02_6448455-4-64496214 | <i>AT5G64020</i> | Involved in the synthesis and deposition of secondary wall cellulose.                             |
| <i>BnaC02G0544000ZS</i> | chrC02_6419131-2-64201889 | <i>AT5G64570</i> | Encodes a secreted beta-d-xylosidase that belongs to family 3 of glycoside hydrolases.            |
| <i>BnaA07G0142000ZS</i> | chrA07_1527917-8-15280808 | <i>AT5G67230</i> | Encodes a member of the GT43 family glycosyltransferases involved in glucuronoxylan biosynthesis. |

**Supplementary Table S3 Differentially expressed genes in rape stems in related regions.**

| Candidate genes         | Homologs in<br><i>Arabidopsis</i> | Functional annotation                                                                                                    | log2FC |
|-------------------------|-----------------------------------|--------------------------------------------------------------------------------------------------------------------------|--------|
| <i>BnaC02G0460900ZS</i> |                                   | unknown                                                                                                                  | -5.52  |
| <i>BnaC02G0467000ZS</i> | <i>AT3G27970</i>                  | Exonuclease family protein                                                                                               | -4.18  |
| <i>BnaC02G0467600ZS</i> | <i>AT3G28007</i>                  | Intercellular exchange of sugar efflux transporter                                                                       | -2.86  |
| <i>BnaC02G0050400ZS</i> | <i>AT5G12120</i>                  | Ubiquitin-associated/translation elongation factor EF1B protein                                                          | -5.85  |
| <i>BnaC02G0468300ZS</i> | <i>AT3G28180</i>                  | encodes a gene similar to cellulose synthase                                                                             | -4.71  |
| <i>BnaC02G0469400ZS</i> | <i>AT3G28420</i>                  | Putative membrane lipoprotein                                                                                            | -3.32  |
| <i>BnaC02G0050600ZS</i> | <i>AT5G12140</i>                  | Encodes a cystatin                                                                                                       | -4.70  |
| <i>BnaC02G0470400ZS</i> | <i>AT3G28740</i>                  | Encodes a member of the cytochrome p450 family                                                                           | 7.48   |
| <i>BnaC02G0050700ZS</i> | <i>AT5G12170</i>                  | Encodes one of the CRT-Like transporters                                                                                 | -3.21  |
| <i>BnaC02G0470600ZS</i> | <i>AT2G43800</i>                  | Participate in intercellular plasmodesmata                                                                               | -4.94  |
| <i>BnaC02G0471200ZS</i> | <i>Atlg56140</i>                  | Leucine-rich repeat transmembrane protein kinase                                                                         | -2.45  |
| <i>BnaC02G0471700ZS</i> | <i>Atlg56140</i>                  | Leucine-rich repeat transmembrane protein kinase                                                                         | -5.00  |
| <i>BnaC02G0050900ZS</i> | <i>AT5G12270</i>                  | 2-oxoglutarate (2OG) and Fe (II)-dependent oxygenase superfamily protein                                                 | -6.54  |
| <i>BnaC02G0051000ZS</i> | <i>AT5G12290</i>                  | Encodes a mitochondrial outer membrane protein                                                                           | -5.29  |
| <i>BnaC05G0022700ZS</i> | <i>AT1G03780</i>                  | Involved in mitotic spindle assembly during late prophase and early prometaphase                                         | -2.95  |
| <i>BnaC05G0025600ZS</i> | <i>AT1G04220</i>                  | Encodes KCS2, a member of the 3-ketoacyl-CoA synthase family                                                             | -3.70  |
| <i>BnaC05G0025700ZS</i> | <i>AT1G04240</i>                  | SHY2/IAA3 regulates multiple auxin responses in roots                                                                    | -3.51  |
| <i>BnaC05G0028200ZS</i> | <i>AT1G04520</i>                  | Encodes a plasmodesmal protein that may be involved in the intercellular movement of molecules through the plasmodesmata | -2.87  |
| <i>BnaC05G0030000ZS</i> | <i>AT1G04680</i>                  | Pectin lyase-like superfamily protein                                                                                    | -3.39  |
| <i>BnaC05G0031100ZS</i> | <i>AT1G80960</i>                  | F-box and Leucine Rich Repeat domains containing protein                                                                 | 4.87   |
| <i>BnaC05G0034700ZS</i> | <i>AT1G14400</i>                  | ubiquitin carrier protein                                                                                                | -6.00  |
| <i>BnaC05G0036500ZS</i> | <i>AT1G05291</i>                  | GPI inositol-deacylase C, putative (DUF1218)                                                                             | 3.48   |
| <i>BnaC05G0037000ZS</i> | <i>AT2G32210</i>                  | cysteine-rich/transmembrane domain A-like protein                                                                        | 2.55   |
| <i>BnaC05G0040300ZS</i> | <i>AT1G44130</i>                  | Eukaryotic aspartyl protease family protein                                                                              | -3.32  |
| <i>BnaC05G0040700ZS</i> | <i>AT3G12630</i>                  | Encodes a protein with E3 ligase activity                                                                                | 4.86   |
| <i>BnaC05G0042000ZS</i> | <i>AT3G24610</i>                  | Galactose oxidase/kelch repeat superfamily protein                                                                       | -5.44  |
| <i>BnaC05G0043700ZS</i> | <i>AT1G06090</i>                  | Membrane bound acyl-lipid desaturases which can perform $\Delta 9$ desaturation                                          | -2.96  |
| <i>BnaC05G0044400ZS</i> | <i>AT1G06180</i>                  | member of MYB3R- and R2R3- type MYB- encoding genes                                                                      | -3.40  |
| <i>BnaC05G0047700ZS</i> | <i>AT1G06570</i>                  | 4-HYDROXYPHENYLPYRUVATE DIOXYGENASE                                                                                      | 3.55   |
| <i>BnaC05G0048000ZS</i> | <i>AT1G06645</i>                  | 2-oxoglutarate (2OG) and Fe(II)-dependent oxygenase superfamily protein                                                  | 3.00   |
| <i>BnaC05G0049800ZS</i> | <i>AT1G06930</i>                  | TPRXL                                                                                                                    | -3.61  |
| <i>BnaC05G0061300ZS</i> | <i>AT1G08310</i>                  | alpha/beta-Hydrolases superfamily protein                                                                                | 3.24   |
| <i>BnaC05G0063900ZS</i> | <i>AT1G08560</i>                  | member of SYP11 syntaxin Gene Family localized in the trans-Golgi network                                                | -3.01  |
| <i>BnaC05G0068200ZS</i> | <i>AT1G09155</i>                  | phloem protein 2-B15                                                                                                     | -2.49  |
| <i>BnaC05G0070100ZS</i> | <i>AT1G09310</i>                  | ABA responsive trichome formation regulator                                                                              | -7.73  |
| <i>BnaC05G0073600ZS</i> | <i>AT1G09600</i>                  | Protein kinase superfamily protein                                                                                       | -2.23  |
| <i>BnaC05G0076800ZS</i> | <i>AT1G09890</i>                  | Rhamnogalacturonate lyase family protein                                                                                 | -4.14  |

|                         |                  |                                                                                                                                                                                                                |       |
|-------------------------|------------------|----------------------------------------------------------------------------------------------------------------------------------------------------------------------------------------------------------------|-------|
| <i>BnaC05G0077900ZS</i> | <i>AT4G10320</i> | tRNA synthetase class I (I, L, M and V) family protein                                                                                                                                                         | -5.36 |
| <i>BnaC05G0078800ZS</i> | <i>AT1G10060</i> | encodes a mitochondrial branched-chain amino acid aminotransferase                                                                                                                                             | -4.22 |
| <i>BnaC05G0081300ZS</i> | <i>AT1G10370</i> | Encodes GSTU17 (Glutathione S-Transferase U17). Functions as a negative component of stress-mediated signal transduction pathways                                                                              | -2.64 |
| <i>BnaC05G0081400ZS</i> | <i>AT1G10370</i> | Encodes GSTU17 (Glutathione S-Transferase U17). Functions as a negative component of stress-mediated signal transduction pathways                                                                              | -2.40 |
| <i>BnaC05G0085100ZS</i> | <i>AT1G10640</i> | Pectin lyase-like superfamily protein                                                                                                                                                                          | -5.81 |
| <i>BnaC05G0086000ZS</i> | <i>AT1G25480</i> | Encodes a phosphorylation-dependent anion channel                                                                                                                                                              | 4.09  |
| <i>BnaC05G0087700ZS</i> |                  | unknown                                                                                                                                                                                                        | -5.72 |
| <i>BnaC05G0088300ZS</i> | <i>AT1G60950</i> | encodes a major leaf                                                                                                                                                                                           | -3.06 |
| <i>BnaC05G0088700ZS</i> | <i>AT1G14800</i> | Nucleic acid-binding, OB-fold-like protein                                                                                                                                                                     | -5.99 |
| <i>BnaC05G0089100ZS</i> | <i>AT1G11080</i> | serine carboxypeptidase-like 31                                                                                                                                                                                | 7.77  |
| <i>BnaC05G0089400ZS</i> | <i>AT1G11120</i> | CTTNBP 2 amino-terminal-like protein                                                                                                                                                                           | -2.97 |
| <i>BnaC05G0090000ZS</i> | <i>AT1G11170</i> | lysine ketoglutarate reductase trans-splicing-like protein (DUF707)                                                                                                                                            | 3.71  |
| <i>BnaC05G0091400ZS</i> | <i>AT1G80740</i> | ecotype KI-0 chromomethylase (CMT1). Reduce the tumor formation mediated by Agrobacterium                                                                                                                      | -3.46 |
| <i>BnaC05G0092200ZS</i> | <i>AT1G11545</i> | xyloglucan endotransglucosylase/hydrolase 8                                                                                                                                                                    | -2.99 |
| <i>BnaC05G0094000ZS</i> | <i>AT1G11790</i> | Encodes a plastid-localized arogenate dehydratase involved in phenylalanine biosynthesis                                                                                                                       | -2.93 |
| <i>BnaC05G0094900ZS</i> | <i>AT1G13340</i> | Regulator of Vps4 activity in the MVB pathway protein                                                                                                                                                          | 3.46  |
| <i>BnaC05G0098800ZS</i> | <i>AT1G12845</i> | transmembrane protein                                                                                                                                                                                          | -3.29 |
| <i>BnaC05G0103000ZS</i> | <i>AT1G15880</i> | Golgi SNARE 11 protein (GOS11)                                                                                                                                                                                 | 4.20  |
| <i>BnaC05G0104300ZS</i> |                  | unknown                                                                                                                                                                                                        | -3.59 |
| <i>BnaC05G0106400ZS</i> | <i>AT1G11900</i> | Tetratricopeptide repeat (TPR)-like superfamily protein                                                                                                                                                        | 5.16  |
| <i>BnaC05G0110200ZS</i> | <i>AT1G13830</i> | Carbohydrate-binding X8 domain superfamily protein                                                                                                                                                             | 4.49  |
| <i>BnaC05G0111300ZS</i> | <i>AT1G14020</i> | O-fucosyltransferase family protein                                                                                                                                                                            | 5.08  |
| <i>BnaC05G0111400ZS</i> | <i>AT1G14020</i> | O-fucosyltransferase family protein                                                                                                                                                                            | 6.22  |
| <i>BnaC05G0112400ZS</i> | <i>AT1G14100</i> | member of Glycosyltransferase Family- 37                                                                                                                                                                       | -3.68 |
| <i>BnaC05G0112800ZS</i> | <i>AT1G14170</i> | RNA-binding KH domain-containing protein                                                                                                                                                                       | -4.68 |
| <i>BnaC05G0113000ZS</i> | <i>AT1G14180</i> | RING/U-box superfamily protein                                                                                                                                                                                 | 3.37  |
| <i>BnaC05G0115700ZS</i> | <i>AT1G14450</i> | NADH dehydrogenase (ubiquinone)s                                                                                                                                                                               | -5.61 |
| <i>BnaC05G0115900ZS</i> | <i>AT5G07300</i> | Encodes a copine-like protein, a member of a newly identified class of calcium-dependent                                                                                                                       | 6.33  |
| <i>BnaC05G0116300ZS</i> |                  | unknown                                                                                                                                                                                                        | 4.63  |
| <i>BnaC05G0118100ZS</i> | <i>AT1G14600</i> | Homeodomain-like superfamily protein                                                                                                                                                                           | -3.00 |
| <i>BnaC05G0118400ZS</i> | <i>AT1G14630</i> | XRI1-like protein                                                                                                                                                                                              | -4.21 |
| <i>BnaC05G0118600ZS</i> | <i>AT1G14660</i> | member of putative Na <sup>+</sup> /H <sup>+</sup> antiporter (AtNHX) family. Functions as a plasma membrane Li <sup>+</sup> /H <sup>+</sup> antiporter. Involved in Li <sup>+</sup> efflux and detoxification | -4.61 |
| <i>BnaC05G0121900ZS</i> | <i>AT3G30739</i> | hypothetical protein                                                                                                                                                                                           | 7.30  |
| <i>BnaC05G0124600ZS</i> | <i>AT1G15050</i> | Belongs to auxin inducible gene family                                                                                                                                                                         | -4.57 |
| <i>BnaC05G0125800ZS</i> | <i>AT1G15210</i> | pleiotropic drug resistance 7                                                                                                                                                                                  | -4.89 |
| <i>BnaC05G0127100ZS</i> | <i>AT1G48900</i> | Signal recognition particle, SRP54 subunit protein                                                                                                                                                             | -3.44 |
| <i>BnaC05G0127900ZS</i> | <i>AT1G15380</i> | Member of the GLY1 family                                                                                                                                                                                      | 2.67  |

|                         |                  |                                                                                    |        |
|-------------------------|------------------|------------------------------------------------------------------------------------|--------|
| <i>BnaC05G0130700ZS</i> | <i>AT1G15670</i> | Encodes a member of a family of F-box proteins (KMD)                               | -2.71  |
| <i>BnaC05G0133500ZS</i> | <i>AT1G15980</i> | encodes the chloroplast NAD(P)H dehydrogenase complex                              | 2.69   |
| <i>BnaC05G0133700ZS</i> |                  | unknown                                                                            | 4.30   |
| <i>BnaC05G0134100ZS</i> | <i>AT1G16070</i> | Member of TLP family                                                               | -4.53  |
| <i>BnaC05G0136700ZS</i> | <i>AT1G16410</i> | member of CYP79F, Encodes cytochrome P450                                          | -10.74 |
| <i>BnaC05G0137500ZS</i> | <i>AT1G16490</i> | Member of the R2R3 factor gene family                                              | -3.53  |
| <i>BnaC05G0138800ZS</i> | <i>AT1G16630</i> | transmembrane protein                                                              | -4.66  |
| <i>BnaC08G0417900ZS</i> | <i>AT3G63010</i> | Encodes a gibberellin (GA) receptor ortholog of the rice GA receptor gene (OsGID1) | 3.29   |
| <i>BnaC08G0418800ZS</i> | <i>AT3G63110</i> | Encodes cytokinin synthase involved in cytokinin biosynthesis                      | 4.97   |
| <i>BnaC08G0419600ZS</i> | <i>AT3G63200</i> | PATATIN-like protein 9                                                             | -2.59  |

**Supplementary Table S4 The 139 rapeseed core germplasm resources with hemicellulose content measured.**

| ID | Accession name | Origin         |
|----|----------------|----------------|
| 1  | 28             | Hubei (China)  |
| 2  | R6             | Hubei (China)  |
| 3  | 1019B          | Hubei (China)  |
| 4  | R9             | Hubei (China)  |
| 5  | 1055B          | Hubei (China)  |
| 6  | Chuan2121      | Hubei (China)  |
| 7  | 6098B          | Hubei (China)  |
| 8  | HPR1           | Hubei (China)  |
| 9  | Zayou66        | Hubei (China)  |
| 10 | K219           | Hubei (China)  |
| 11 | 8089           | Hubei (China)  |
| 12 | Shan2C         | Shanxi (China) |
| 13 | 8908B          | Hubei (China)  |
| 14 | Zhongshuang2   | Hubei (China)  |
| 15 | Shan2B         | Shanxi (China) |
| 16 | Zhongshuang6   | Hubei (China)  |
| 17 | R1             | Hubei (China)  |
| 18 | R11            | Hubei (China)  |
| 19 | R2             | Hubei (China)  |
| 20 | Zhongshuang11  | Hubei (China)  |
| 21 | Nilla          | European       |
| 22 | OG3186         | Hubei (China)  |
| 23 | Cibrabra       | European       |
| 24 | OG3237         | Hubei (China)  |
| 25 | Apomix         | European       |
| 26 | OG3151         | Hubei (China)  |
| 27 | OG2097         | Hubei (China)  |
| 28 | OG3156         | Hubei (China)  |
| 29 | OG2086         | Hubei (China)  |
| 30 | OG3174         | Hubei (China)  |
| 31 | OG2118         | Hubei (China)  |
| 32 | OG3183         | Hubei (China)  |
| 33 | OG3229         | Hubei (China)  |
| 34 | OG3187         | Hubei (China)  |
| 35 | Oscar          | Hubei (China)  |

|    |               |                   |
|----|---------------|-------------------|
| 36 | OG3190        | Hubei (China)     |
| 37 | OG3191        | Hubei (China)     |
| 38 | Zheyoun50     | Zhejiang (China)  |
| 39 | HM42          | Zhejiang (China)  |
| 40 | Huashuang5    | Hubei (China)     |
| 41 | Huyou17       | Shanghai (China)  |
| 42 | L233          | Chongqing (China) |
| 43 | Rivette       | Australia         |
| 44 | RR001         | Australia         |
| 45 | 0331-1        | Hubei (China)     |
| 46 | Zheyoun21     | Zhejiang (China)  |
| 47 | Zhongshuang4  | Hubei (China)     |
| 48 | Zheshuang6    | Zhejiang (China)  |
| 49 | Zhongshuang10 | Hubei (China)     |
| 50 | Zheyoun28     | Zhejiang (China)  |
| 51 | Zheshuang72   | Zhejiang (China)  |
| 52 | Westar        | Canada            |
| 53 | Zheshuang8    | Zhejiang (China)  |
| 54 | BLN3344       | Australia         |
| 55 | BLN3346       | Australia         |
| 56 | BLN3350       | Australia         |
| 57 | BLN3352       | Australia         |
| 58 | RT006         | Australia         |
| 59 | RT108         | Australia         |
| 60 | RT123         | Australia         |
| 61 | FC03          | Australia         |
| 62 | Huyoun21      | Shanghai (China)  |
| 63 | YangJ6711     | Jiangsu (China)   |
| 64 | Zheng2736     | Jiangsu (China)   |
| 65 | HX0352        | Hubei (China)     |
| 66 | BLN3342       | Australia         |
| 67 | Zhen2609      | Jiangsu (China)   |
| 68 | Zhen3736      | Hubei (China)     |
| 69 | Ningyoun16    | Jiangsu (China)   |
| 70 | Zhongyoun821  | Hubei (China)     |
| 71 | Ningyoun18    | Jiangsu (China)   |
| 72 | Fan168        | Hubei (China)     |
| 73 | Zhenyoun5     | Jiangsu (China)   |
| 74 | Fan189        | Hubei (China)     |
| 75 | Yangyoun4     | Jiangsu (China)   |
| 76 | J110          | Hubei (China)     |
| 77 | Yangyoun6     | Jiangsu (China)   |
| 78 | J474          | Hubei (China)     |
| 79 | Huyoun15      | Shanghai (China)  |
| 80 | Zhongshuang7  | Hubei (China)     |
| 81 | Huyoun16      | Shanghai (China)  |
| 82 | Zhongshuang9  | Hubei (China)     |
| 83 | Huyoun19      | Shanghai (China)  |
| 84 | Zheyoun18     | Zhejiang (China)  |
| 85 | P10           | Chongqing (China) |
| 86 | 901           | Hubei (China)     |
| 87 | P96           | Chongqing (China) |
| 88 | Huashuang3    | Hubei (China)     |

|     |              |                   |
|-----|--------------|-------------------|
| 89  | P130         | Chongqing (China) |
| 90  | Huashuang4   | Hubei (China)     |
| 91  | F403         | Chongqing (China) |
| 92  | F406         | Chongqing (China) |
| 93  | RR013        | Australia         |
| 94  | F421         | Chongqing (China) |
| 95  | Trigold      | Australia         |
| 96  | F426         | Chongqing (China) |
| 97  | RR005        | Australia         |
| 98  | F428         | Chongqing (China) |
| 99  | AV-SAPPHIRE  | Australia         |
| 100 | F437         | Chongqing (China) |
| 101 | AG-outback   | Australia         |
| 102 | F459         | Chongqing (China) |
| 103 | Purler       | Australia         |
| 104 | L239         | Chongqing (China) |
| 105 | RR002        | Australia         |
| 106 | L238         | Chongqing (China) |
| 107 | GSL2         | India             |
| 108 | L230         | Chongqing (China) |
| 109 | Monty        | Australia         |
| 110 | L229         | Chongqing (China) |
| 111 | TQ055-02W2   | Australia         |
| 112 | L228         | Chongqing (China) |
| 113 | Skipton      | Australia         |
| 114 | BST7-02M2    | Australia         |
| 115 | 0594-1       | Hubei (China)     |
| 116 | 0789-3       | Hubei (China)     |
| 117 | 2772193      | Hubei (China)     |
| 118 | 0802-1       | Hubei (China)     |
| 119 | 2776848      | Hubei (China)     |
| 120 | 0832-1       | Hubei (China)     |
| 121 | 2797029      | Hubei (China)     |
| 122 | 303577       | Hubei (China)     |
| 123 | 9559-30      | Hubei (China)     |
| 124 | 2445726      | Hubei (China)     |
| 125 | 2923858      | Hubei (China)     |
| 126 | 2446821      | Hubei (China)     |
| 127 | 2924133      | Hubei (China)     |
| 128 | 2599067      | Hubei (China)     |
| 129 | Wanyou12     | Anhui (China)     |
| 130 | 2601379      | Hubei (China)     |
| 131 | Wanyou20     | Anhui (China)     |
| 132 | 2675828      | Hubei (China)     |
| 133 | Zheshuang3   | Zhejiang (China)  |
| 134 | 2677350      | Hubei (China)     |
| 135 | Zheshuang758 | Zhejiang (China)  |
| 136 | 2734208      | Hubei (China)     |
| 137 | NY 7         | Jiangsu (China)   |
| 138 | 2734969      | Hubei (China)     |
| 139 | Matador      | European          |



Supplementary Figure S1 Temperature changes of rapeseed planted in three environments.

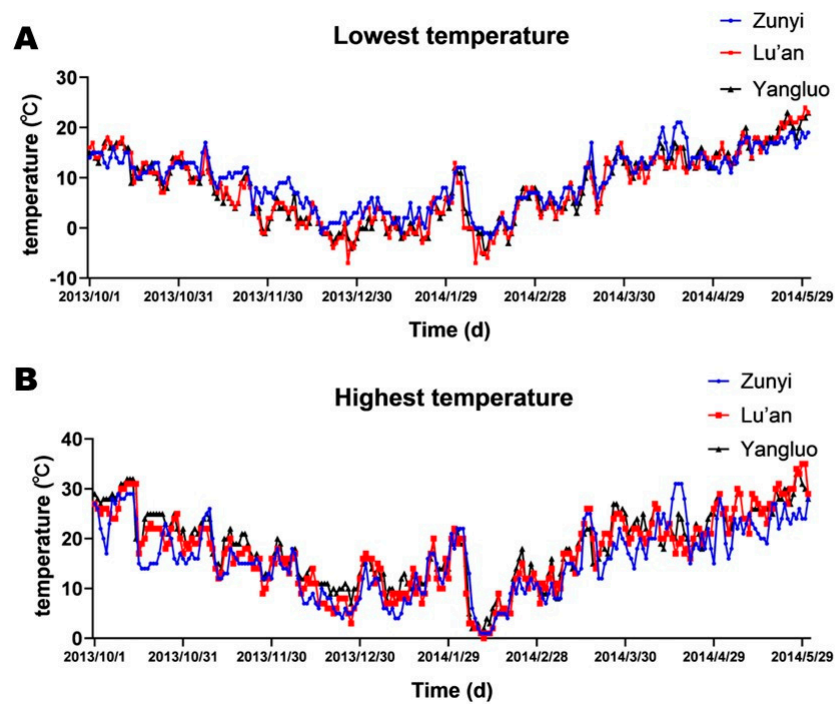

Supplement: s1 [file s1]
